# 1 Systematic Engineering of Artificial Metalloenzymes for New-to- 2 Nature Reactions

3  
4 Tobias Vornholt,<sup>1,3</sup> Fadri Christoffel,<sup>2,3,§</sup> Michela M. Pellizzoni,<sup>2,3,§</sup> Sven Panke,<sup>1,3</sup> Thomas R. Ward<sup>2,3</sup> and  
5 Markus Jeschek<sup>1,3,\*</sup>

6 <sup>1</sup>Department of Biosystems Science and Engineering, ETH Zurich, Basel CH-4058, Switzerland

7 <sup>2</sup>Department of Chemistry, University of Basel, Mattenstrasse 24a, BPR 1096, CH-4002 Basel  
8 Switzerland

9 <sup>3</sup>National Centre of Competence in Research (NCCR) Molecular Systems Engineering, Switzerland; Web:  
10 [www.nccr-mse.ch](http://www.nccr-mse.ch)

11 <sup>§</sup>Both authors contributed equally

12 <sup>\*</sup>Correspondence to: [markus.jeschek@bsse.ethz.ch](mailto:markus.jeschek@bsse.ethz.ch)

## 13 14 Abstract

15 Artificial metalloenzymes (ArMs) catalyzing new-to-nature reactions under mild conditions could play an  
16 important role in the transition to a sustainable, circular economy. While ArMs have been created for a  
17 variety of bioorthogonal transformations, attempts at optimizing their performance by enzyme engineering  
18 have been case-specific and resulted only in modest improvements. To realize the full potential of ArMs,  
19 methods that enable the rapid discovery of highly active ArM variants for any reaction of interest are  
20 required. Here, we introduce a broadly applicable, automation-compatible ArM engineering platform, which  
21 relies on periplasmic compartmentalization in *Escherichia coli* to rapidly and reliably identify improved ArM  
22 variants based on the biotin-streptavidin technology. We systematically assess 400 ArM mutants for five  
23 bioorthogonal transformations involving different metal cofactors, reaction mechanisms and substrate-  
24 product pairs, including novel ArMs for gold-catalyzed hydroamination and hydroarylation. The achieved  
25 activity enhancements of up to fifteen-fold over wild type highlight the potential of the systematic approach  
26 to ArM engineering. We further capitalize on the sequence-activity data to suggest and validate smart  
27 strategies for future screening campaigns. This systematic, multi-reaction study has important implications  
28 for the development of highly active ArMs for novel applications in biocatalysis and synthetic biology.

## 29 Introduction

30 Artificial metalloenzymes (ArMs) combine the broad reaction scope of organometallic catalysis with the  
31 exceptional catalytic performance, selectivity and mild reaction conditions of enzymes<sup>1,2</sup>. Therefore, they  
32 have a great potential to enable sustainable synthetic routes to various compounds of interest<sup>3,4</sup> and, if  
33 functional in a cellular environment, open up new possibilities for metabolic engineering and synthetic  
34 biology<sup>5</sup>. ArMs have been constructed by repurposing natural metalloenzymes<sup>6,7</sup>, designing binding sites  
35 for metal ions<sup>8-11</sup> and incorporating organometallic cofactors into protein scaffolds<sup>12-20</sup>. Moreover, unnatural  
36 amino acids<sup>21</sup> and photoexcitation<sup>22,23</sup> have been used to unlock new reactivity in enzymes. Amongst these  
37 efforts to create new-to-nature biocatalysts, one of the most versatile approaches relies on the biotin-  
38 streptavidin technology. This strategy employs the high affinity of the homotetrameric protein streptavidin  
39 (Sav) for the vitamin D-biotin to non-covalently anchor biotinylated metal complexes (referred to as cofactor  
40 hereafter) within the Sav protein. Using this approach, artificial enzymes have been created for multiple  
41 reactions, including hydrogenation, sulfoxidation, C-H activation and olefin metathesis<sup>24-26</sup>. While in some  
42 cases wild-type Sav imparts some selectivity or rate acceleration on the reaction, protein engineering is  
43 usually required in order to obtain proficient biocatalysts<sup>27-31</sup>. Initial studies in this direction relied on  
44 screening (semi-)purified Sav mutants<sup>32,33</sup>, but more recently a trend towards whole-cell screening with  
45 *Escherichia coli* has emerged for Sav-based ArMs<sup>34,35</sup> as well as other artificial enzymes<sup>8,36,37</sup>. This allows  
46 significantly increased throughput and is the method of choice if variants that are functional under *in vivo*  
47 conditions are desired, which is an important prerequisite for synthetic biology applications.

48 However, a number of challenges arise for cell-based ArM assays, most notably insufficient cofactor uptake  
49 into the cell as well as cofactor poisoning by cellular components such as reduced glutathione<sup>38</sup>. In order to  
50 circumvent these challenges, Sav has been exported to the periplasmic space<sup>34</sup> or the cell surface<sup>35</sup>. While  
51 these studies have established the possibility of engineering ArMs using whole-cell screenings, they did so  
52 using case-specific engineering strategies and with a focus on reactions affording fluorescent products.  
53 Consequently, general applicability of these methods across various reactions remains to be demonstrated.  
54 To generalize the development of ArMs, broadly applicable engineering strategies that enable the rapid  
55 identification of highly active variants for ideally any reaction of interest are needed. This requires a robust  
56 screening protocol that is compatible with various reaction conditions and analytical readouts. Moreover, it  
57 imposes a demand for Sav mutant libraries that embody a high potential to contain highly active variants  
58 for different reactions while maintaining a comparably small and thus screenable library size. Such a  
59 combination of a broadly applicable screening method with a “concise” library could serve as a universal  
60 starting point for various ArM engineering campaigns and would render tedious case-by-case method and  
61 library development obsolete. Herein, we present a screening platform that meets the aforementioned  
62 requirements as a first systematic approach to ArM engineering. We establish a well-plate based screening  
63 protocol that can be easily adapted to new reaction conditions or analytical methods and show that it is  
64 amenable to lab automation as an important prerequisite for streamlined ArM engineering. Further, we

65 create a full-factorial, sequence-defined Sav library that is rich in variants with high activity by  
66 simultaneously diversifying two crucial amino acid positions in close vicinity to the catalytic metal. To  
67 demonstrate the versatility of this platform, we selected five bioorthogonal reactions requiring different  
68 cofactors, reaction conditions and analytical readouts. The platform enabled the identification of  
69 substantially improved ArMs for all tested reactions with fast turnaround times. Moreover, the systematic  
70 characterization of the local sequence-activity landscape enabled us to identify smart library designs to  
71 further enhance the development of ArMs. This study represents the first systematic approach to ArM  
72 engineering and thus constitutes an important step towards a streamlined optimization of these novel  
73 biocatalysts.

## 74 **Results**

### 75 **Construction and characterization of a sequence-defined Sav library**

76 In order to establish a generalizable first engineering step for ArMs, we sought to generate a library of Sav  
77 variants that offers a high likelihood of identifying active variants at a minimized screening effort. Based on  
78 previous experience with Sav expression and whole-cell ArM catalysis<sup>34,35</sup>, we selected a periplasmic  
79 compartmentalization strategy for this library. Secretion to the periplasm and subsequent ArM assembly  
80 represents a good trade-off between accessibility to the cofactor, expression levels and compatibility of the  
81 reaction conditions<sup>39</sup>. In order to facilitate periplasmic export in *E. coli*, the signal peptide of the outer  
82 membrane protein A (OmpA) was N-terminally fused to T7-tagged mature Sav (referred to as wild type  
83 hereafter) as previously reported<sup>34</sup>. The holoenzyme (i.e. full ArM with cofactor) can then be assembled in  
84 the periplasm by incubating cells in a buffer containing a biotinylated metal cofactor (Fig. 1a). We selected  
85 the amino acid residues 112 and 121 in Sav as randomization targets, which correspond to serine and  
86 lysine in wild-type Sav. These residues are in close proximity to the biotinylated cofactor<sup>32</sup> (Fig. 1b) and  
87 have repeatedly been found to have a substantial impact on the activity of ArMs for diverse cofactors and  
88 reactions<sup>33-35</sup>. More specifically, we created a combinatorial Sav 112X 121X library (X representing all 20  
89 canonical amino acids) consisting of all 400 possible amino acid combinations for these two positions. Such  
90 a full-factorial library makes it possible to identify improved mutants that are the result of synergistic  
91 interactions between the two positions. We applied a three-step cloning and sequencing strategy (see  
92 Methods and Supplementary Figs. 1-3) to produce an arrayed, sequence-verified set of all 400 possible  
93 Sav 112X 121X mutants. This minimizes the screening effort by avoiding the requirement for oversampling.

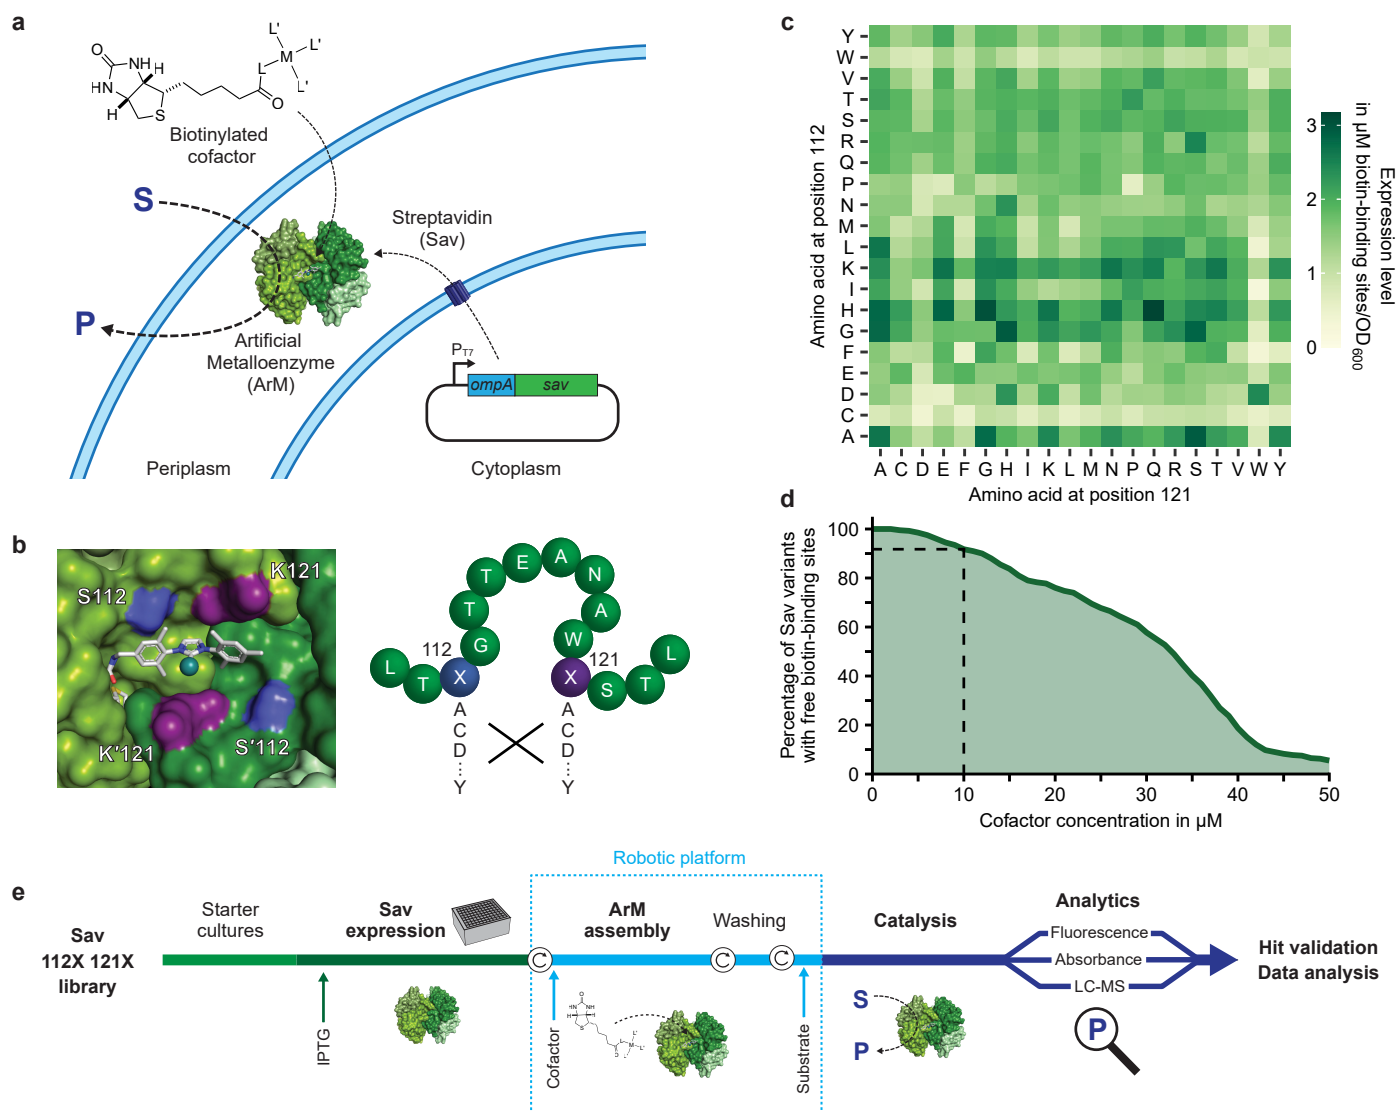

**Figure 1 | Platform for the systematic screening of ArMs in *E. coli*'s periplasm.** **a**, By fusion to the signal peptide of the outer membrane protein A (OmpA), Sav is secreted to the periplasm, where it binds to an externally-added biotinylated cofactor to afford an ArM. The cofactor consists of a catalytically active metal M and its ligands L and L'. **b**, Left: Close-up view of a bound biotinylated metathesis cofactor within the biotin-binding vestibule of homotetrameric Sav (PDB 5IRA). The symmetry-related amino acids S112 & S'112 (blue) and K121 and K'121 (purple) in Sav are located in the immediate vicinity of the cofactor and were mutated in a combinatorial manner (right), affording an Sav library with 400 amino acid combinations in the two positions. **c**, Expression level of the 400 Sav mutants as determined in cell lysate using a fluorescence quenching assay<sup>40</sup> (Methods). The values displayed are the mean of biological triplicates (n=3) and were normalized to the OD<sub>600</sub> of the cultures (refer to Supplementary Figure 4 for the standard deviation between replicates). **d**, Estimated percentage of Sav mutants with unoccupied biotin-binding sites as a function of the concentration of cofactor added to the cell suspension (assuming 50 % uptake into the periplasm). 10  $\mu$ M were selected as the maximum permitted cofactor concentration for further experiments since this leads to a maintained excess of binding sites for more than 90 % of Sav variants (dashed lines). **e**, Overview of the screening workflow (Methods). Following periplasmic Sav expression in deep-well plates, cells are incubated with the respective biotinylated cofactor and subsequently washed once prior to the addition of substrate (circular arrows represent centrifugation steps for buffer exchange). Depending on the reaction, the product concentration is determined via absorbance or fluorescence measurements or by LC-MS.

Even single mutations can substantially alter the expression level of proteins<sup>41</sup>, which complicates the identification of variants with increased specific activity. For this reason, we aimed to screen at cofactor concentrations that do not fully saturate the available biotin-binding sites even for low-expressing variants

113 (i.e. excess of binding sites). Consequently, we determined the expression level of all 400 Sav mutants from  
114 the 112X 121X library, relying on a quenching assay with biotinylated fluorescent probes<sup>40</sup> (Fig. 1c,  
115 Methods). The majority of variants showed high expression levels ranging from 17 to 536 mg L<sup>-1</sup>, which is  
116 equivalent to concentrations of 1 to 33  $\mu$ M of biotin-binding sites. When normalized by the density of the  
117 cell suspensions, these values amount to 0.2 to 3.2  $\mu$ M binding sites in a culture with an optical density at  
118 600 nm (OD<sub>600</sub>) of one. Importantly, while the expression of variants harboring a cysteine at position 112 or  
119 a tryptophan at either of the two positions appeared to be reduced, 87 % of Sav mutants showed an  
120 expression level greater than 1  $\mu$ M binding sites per OD<sub>600</sub>. Based on these measurements, we determined  
121 a maximum permitted cofactor concentration (Fig. 1d). This critical experimental parameter should on the  
122 one hand be high enough to result in well-detectable product concentrations and on the other hand remain  
123 below the concentration of available biotin-binding sites for the majority of the library. The latter requirement  
124 is important in order to keep the concentration of assembled ArMs constant, irrespective of the expression  
125 level of Sav. In light of previous studies<sup>34</sup> and our own observations (Supplementary Fig. 5), we  
126 conservatively assumed that less than half of externally-added cofactor enters the periplasm. As a  
127 consequence, we set the maximum permitted cofactor concentration at the incubation step to 10  $\mu$ M  
128 because this ensures that an excess of binding sites is maintained for more than 90 % of variants (Fig. 1d),  
129 thus largely eliminating the expression level dependence of the screening results.

## 130 **Systematic screening of ArMs for bioorthogonal reactions**

131 In order to facilitate screening of improved ArMs for diverse reactions, we relied on a 96-well-plate based  
132 assay<sup>34</sup>. In brief, periplasmic expression cultures are spun down and cells are resuspended in an incubation  
133 buffer containing the cofactor of interest to assemble the ArM in the periplasm. After incubation, cells are  
134 washed once to remove unbound cofactor and resuspended in a reaction-specific buffer containing the  
135 substrate. Following overnight incubation, the product concentration is determined using a suitable  
136 analytical method (Fig. 1e). This screening procedure is compatible with various reaction conditions and  
137 analytical methods, and consequently not restricted to model reactions, which, for example, produce a  
138 fluorescent product. Furthermore, it is amenable to lab automation (see below). Relying on this protocol,  
139 we sought to systematically test the full-factorial 400-mutant Sav library for various ArM reactions of interest  
140 (Fig. 2a). To this end, we selected three reactions based on previously reported ArMs: A ring-closing  
141 metathesis (RCM, **I**) of diallyl-sulfonamide **1** to 2,5-dihydro-pyrrole **2**<sup>34</sup> and two deallylation reactions (**II**, **III**)  
142 of allyl carbamate-protected substrates **3** and **5**, affording amino coumarin **4** and indole **6**, respectively. The  
143 corresponding cofactors for these reactions are a biotinylated second-generation Hoveyda-Grubbs catalyst  
144 (**Biot-NHC**)Ru (reaction **I**) and a biotinylated ruthenium cyclopentadienyl complex (**Biot-HQ**)CpRu<sup>42,43</sup>  
145 (reactions **II** and **III**), respectively (Fig. 2b). Further, with the aim of extending the scope of ArM-catalyzed  
146 reactions towards biocompatible nucleophilic cyclizations of alkynes, we developed two novel gold-  
147 containing ArM cofactors, (**Biot-NHC**)Au1 and (**Biot-NHC'**)Au2 (Fig. 2b), to create ArMs for  
148 hydroamination (**IV**) and hydroarylation<sup>44</sup> (**V**) reactions. Importantly, none of these reactions are known to

149 be catalyzed by natural enzymes, and therefore they have potential for applications ranging from the design  
150 of novel metabolic pathways to prodrug activation and *in vivo* labelling<sup>5,45</sup>.

151 While preliminary experiments on the RCM **I** and deallylations **II** and **III** confirmed the compatibility of these  
152 reactions with the periplasmic screening platform, reactions **IV** and **V** showed only little conversion in the  
153 whole-cell assay. Based on previous experience with ArMs<sup>34,38</sup>, we hypothesized that cellular thiols might  
154 inhibit these gold-catalyzed reactions, which we could confirm by *in vitro* experiments with purified Sav.  
155 These revealed a marked inhibitory effect of glutathione and cysteine (Supplementary Fig. 6a). Previously,  
156 we had reported that thiol inhibition can be overcome *in vitro* by adding the oxidizing agent diamide<sup>38</sup>.  
157 Gratifyingly, we observed that diamide also neutralizes the detrimental effect of thiols in whole-cell  
158 experiments, rendering periplasmic gold catalysis feasible (Supplementary Fig. 6b).

159 With a functional periplasmic screening assay for the five reactions at hand, we tested all 400 mutants for  
160 each reaction at least in biological duplicates relying on the aforementioned workflow in 96-deep well plates.  
161 Importantly, we automated the steps required for incubation with cofactor, washing and substrate addition  
162 and applied this automated protocol for reactions **II** and **V**. This substantially reduces the manual labor and  
163 the consumption of consumables. The robotic platform can handle up to eight 96-well plates concurrently.  
164 Accordingly, the 400-member library can be processed in one day and an entire screening (including Sav  
165 expression and analytics) can be performed within one week.

166 Relying on the periplasmic assay, we recorded a local sequence-activity landscape for each ArM (Fig. 2c).  
167 The activity patterns varied substantially between reactions, which points to the existence of specific  
168 interactions between protein, cofactor and substrate, as opposed to unspecific effects, for instance as a  
169 result of varying expression levels. In line with this, we observed no correlation between expression level  
170 and activity for any of the reactions (Supplementary Fig. 7). Hence, the concentration of cofactor, and not  
171 the number of available biotin-binding sites, is limiting, which confirms the validity of the determined  
172 maximum cofactor concentration (see above). Similar activity patterns were only found between the two  
173 deallylation reactions (**II** and **III**), suggesting that in these cases the substrates are sufficiently similar or that  
174 the observed activity is mainly the result of interactions between protein and cofactor.

175 For all reactions, the wild-type variant (S112 K121) had a comparably low activity that was only slightly  
176 above the background observed for cells lacking Sav. Note that this background activity results from  
177 residual cofactor that is unspecifically bound and thus incompletely removed in the washing step.  
178 Importantly, compared to wild-type Sav we identified significantly more active mutants for all five ArM  
179 reactions (Fig. 2d). In order to validate these results, we measured the activity of the most promising variants  
180 of each ArM again in eight replicates, which confirmed the observed enhancements (Fig. 2e). The best  
181 mutants reached fold-improvements over the wild type varying between six- and fifteen-fold. Notably, we  
182 also identified substantially improved variants of the novel, gold-based ArMs for hydroamination (**IV**) and  
183 hydroarylation (**V**), reaching fold-improvements over wild type of about seven- and ten-fold, respectively.

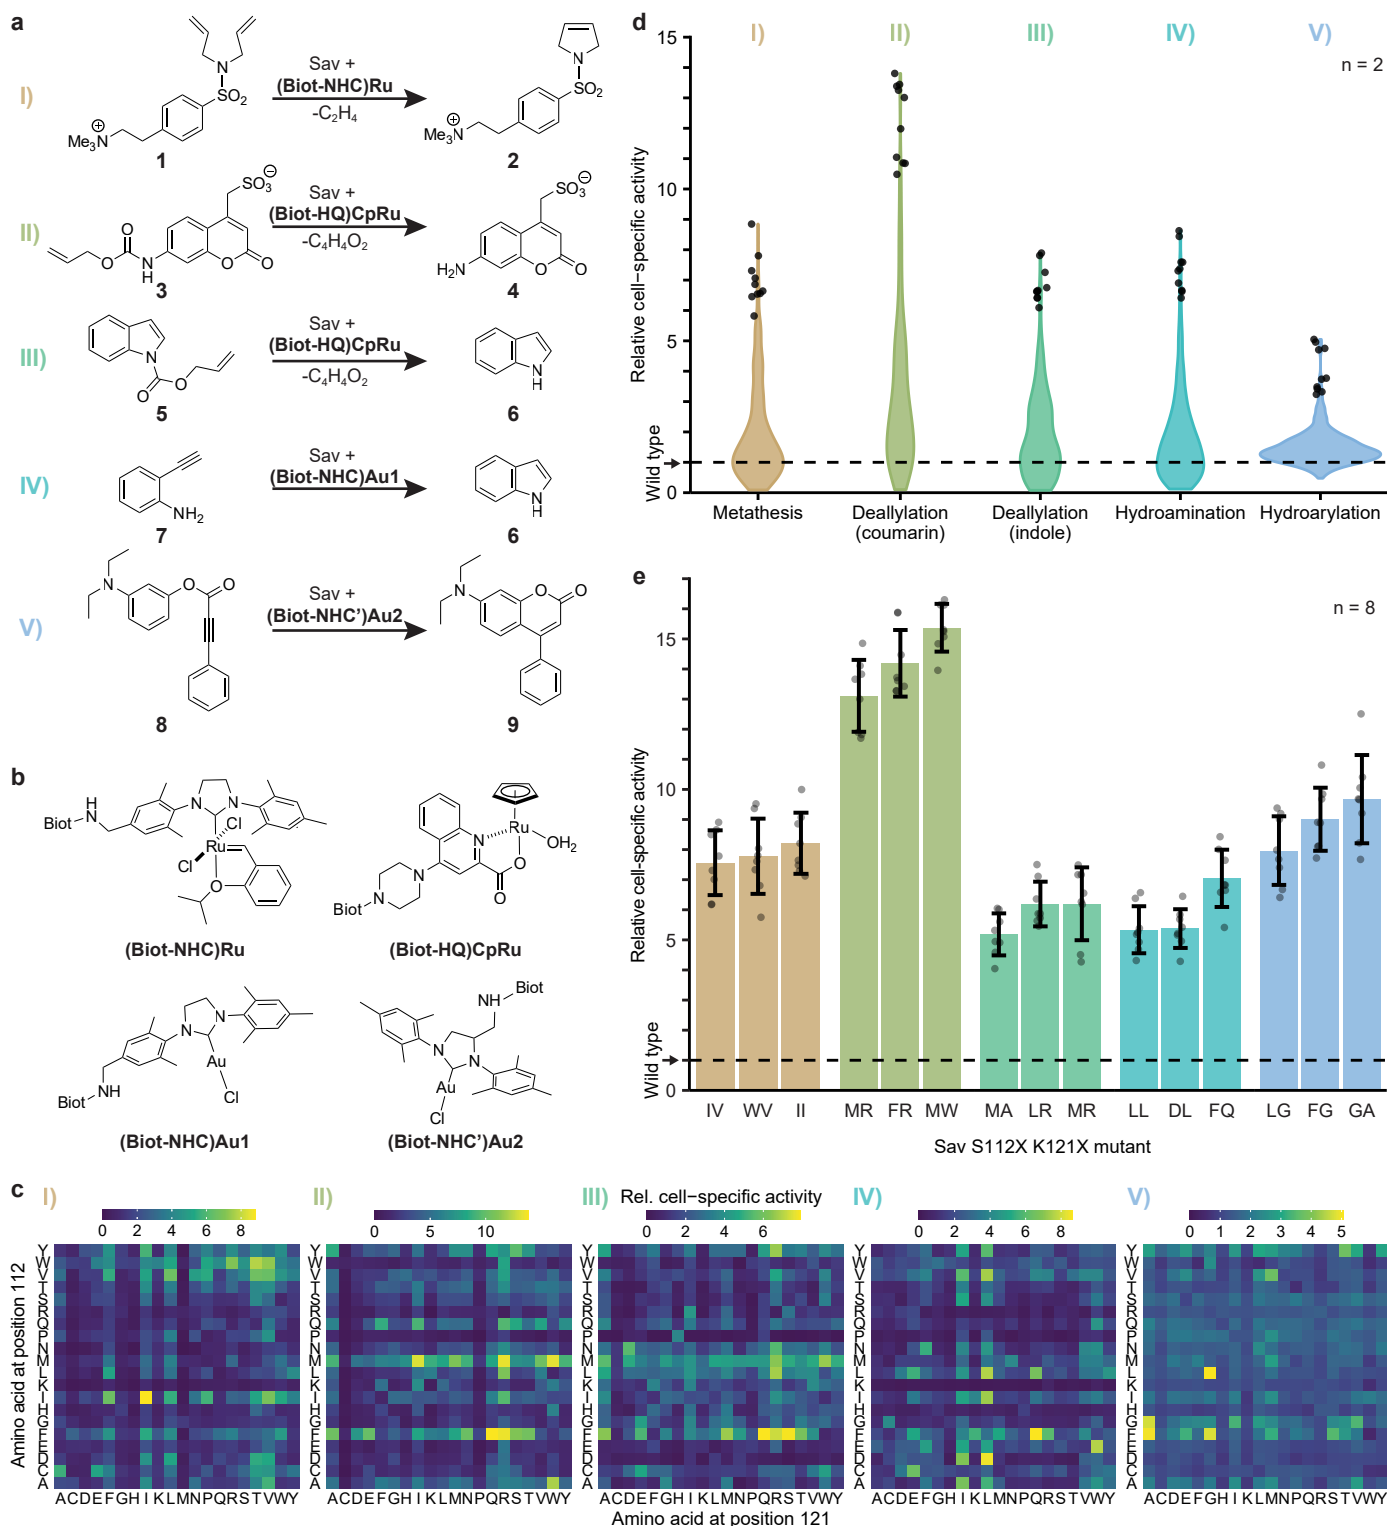

**Figure 2 | Systematic screening for ArMs catalyzing diverse reactions.** **a**, ArM-catalyzed reactions: **I**, Ring-closing metathesis (RCM) with a diallyl-sulfonamide **1** to afford a 2,5-dihydro-pyrrole **2**. **II**, Deallylation of allyl carbamate-protected coumarin **3** to the corresponding amino coumarin **4**. **III**, Deallylation of allyl carbamate indole **5** to indole **6**. **IV**, Hydroamination of 2-ethynylaniline **7** to indole **6**. **V**, Hydroarylation of profluorophore **8** to afford amino coumarin **9**. **b**, Structures of the biotinylated cofactors employed in this study. Biot refers to D-biotin as depicted in Figure 1a. **c**, Cell-specific activity of 400 ArMs mutated at positions 112 and 121 in Sav normalized to the activity of wild-type Sav (S112 K121). The displayed activities correspond to the product concentrations after 20 h of reaction and are the mean of biological duplicate reactions. The corresponding standard deviations between replicates can be found in Supplementary Figure 8. Note that the screenings for reactions **II** and **V** were performed using the robotic platform. **d**, Activity distribution in the Sav mutant library for the five different ArM reactions. Violins comprise all 400 double mutants with the ten most active ArMs depicted as circles. **e**, Validation of "hits" from the 400-mutant screens. Bars correspond to the mean activity of eight biological replicates with standard deviation shown as error bars and individual replicates as circles. Mutants are designated by the amino acids in position 112 and 121.

197 While the screenings were designed towards increased ArM activity in a cellular environment, we sought to  
198 investigate whether the identified variants also display increased activity *in vitro*. We therefore purified the  
199 three most active mutants for each reaction and performed ArM reactions with these (Fig. 3). Notably, all  
200 mutants significantly outperformed the wild-type ArM as well as the corresponding free cofactor, as reflected  
201 by markedly higher turnover numbers (TONs). Depending on the reaction, the best variants reached  
202 between five- and twenty-fold higher TONs than the free cofactor, demonstrating the benefit of embedding  
203 these cofactors within an engineered protein scaffold. It should be noted that in some cases the relative  
204 ranking of variants changed compared to the whole-cell biotransformations, which is likely due to the  
205 different reaction conditions and the absence of cellular components *in vitro*. Nevertheless, the *in vitro*  
206 experiments confirmed that the identified variants indeed have a significantly increased specific activity and  
207 further corroborated the potential of the periplasmic screening platform for the rapid and straightforward  
208 discovery of different ArMs with improved catalytic properties.

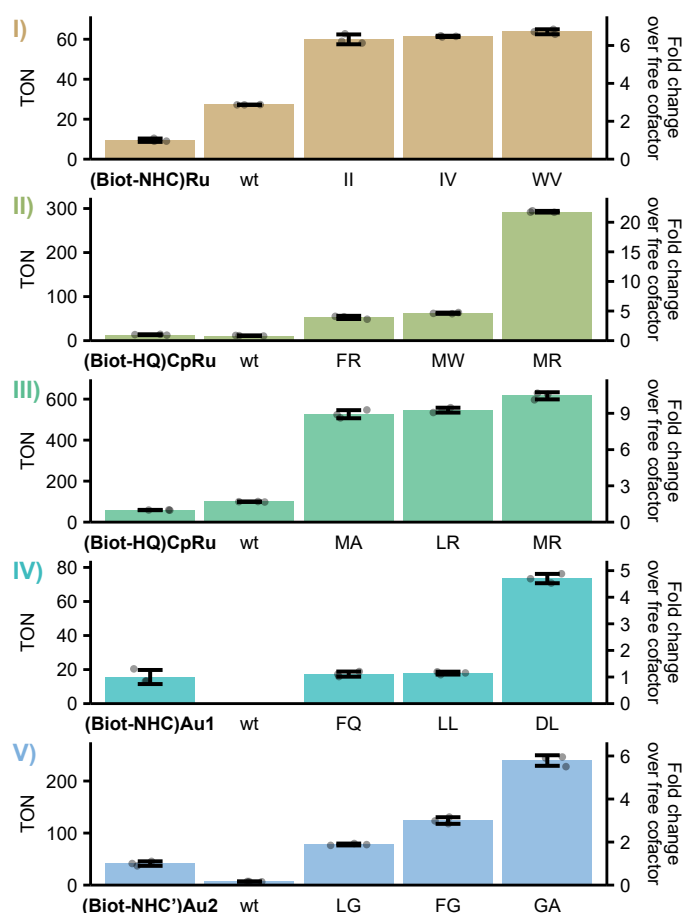

209

210 **Figure 3 | *In vitro* turnover number of ArM variants identified in the periplasmic screening.** For each reaction, the three most  
211 active variants identified in the whole-cell screening were purified and their TON was determined. Reactions were carried out at  
212 37 °C and 200 rpm for 20 h. Bars represent mean TONs of technical triplicate reactions with standard deviation as error bars and  
213 individual replicates as circles. For comparison, the free cofactor and wild-type Sav variant (wt) were included. Mutants are  
214 designated by the amino acids in position 112 and 121.

215

## Analysis of sequence-activity landscapes

216

The recording of sequence-activity data as performed herein provides the basis for additional insight beyond  
217 the mere identification of active mutants. To this end, we first sought to understand which biophysical



218 properties result in the observed activity changes. Therefore, we analyzed the effect of individual amino  
219 acids on the activity of the different ArMs (Fig. 4a): First, we scaled the activity measurements (Fig. 2c)  
220 such that the average activity across the 400 mutant library equals zero and the corresponding standard  
221 deviation equals one. Next, we averaged the scaled activities of all 20 variants that carry the same amino  
222 acid in one position. This was performed for all 20 canonical amino acids and either of the two diversified  
223 positions. As a result, amino acid- and position-specific averages greater or smaller than zero represent a  
224 positive or negative effect on ArM catalysis, respectively. While effects of amino acids varied between  
225 positions and reactions (Fig. 4a), an overall positive effect of hydrophobic amino acids on the activity of the  
226 corresponding ArMs could be observed, whereas charged amino acids as well as proline tend towards a  
227 negative impact. Additionally, we used hierarchical clustering to analyze which amino acids have similar  
228 effects on activity. In line with the previous observation, hydrophobic amino acids clustered clearly  
229 separated from hydrophilic ones, indicating that this property is crucial in terms of catalytic activity (Fig. 4b).  
230 Further, amino acids with similar chemical properties showed a strong tendency to cluster closely together  
231 (note for instance L-I-V, D-E, H-K and S-T clusters). This points to an anticipated large potential of library  
232 strategies that employ reduced amino acid alphabets to maintain a large chemical diversity while  
233 significantly reducing the screening effort (see below).

234 Next, we compared the full-factorial screening approached as pursued herein to other common enzyme  
235 engineering strategies. To this end, we used our screening results to analyze which variants would have  
236 been identified using such heuristics, and how their activity compares to the most active variant identified  
237 in our exhaustive screening. As highlighted in Figure 4c, screening only single mutants (S112X K121 or  
238 S112 K121X) would have led to “hits” with activities ranging from 26 to 65 % relative to the most active  
239 double mutant for the respective ArM reaction. Subsequent combination of the most beneficial single  
240 mutations would have led to an activity increase in two cases, but a decrease in three cases. This suggests  
241 that there are interactions between the two amino acid positions 112 and 121 that lead to non-additive  
242 effects on the overall activity<sup>46</sup>. Indeed, further analysis revealed that between 24 and 37 % of the observed  
243 variance can be attributed to interactions between the two positions (Supplementary Table 1). Notably, the  
244 activity of the best mutants identified in our screening can only be explained by considering non-additive  
245 effects (Supplementary Fig. 9).

246 Iterative saturation mutagenesis (ISM) relies on the sequential randomization of positions, while using the  
247 best variant from the previous round as a starting point for the next<sup>47</sup>. In this way, it can leverage non-  
248 additive interactions to some extent while keeping the experimental effort limited. Indeed, this strategy would  
249 have been more successful than the simple combination of single mutations and would have led to the  
250 discovery of mutants at or near the local activity optimum for two out of five reactions. Nonetheless, this  
251 demonstrates that a full-factorial library enables the discovery of mutants that would likely be missed using  
252 other strategies as they are the result of non-trivial interactions. In addition, note that while sequential  
253 strategies require the analysis of fewer variants, they do not provide universally applicable libraries, which  
254 would be a substantial disadvantage for a general ArM screening platform as proposed here.

255 Unfortunately, full-factorial screening quickly becomes intractable if more positions are to be diversified. An  
 256 established strategy to decrease library size is to use reduced amino acid sets, such as the twelve amino  
 257 acids encoded by NDT codons, which still cover all major classes of amino acid chemistries and lack  
 258 redundant or stop codons<sup>48</sup>. Our analysis shows that this strategy would have been more successful than  
 259 those discussed above, reaching consistently high activities for all ArM reactions. This observation is in line  
 260 with the fact that these twelve amino acids cover the clusters identified in our previous analysis well  
 261 (Fig. 4b). For this reason, it seems promising to screen combinatorial libraries of Sav mutants based on  
 262 such a reduced amino acid set. Further reductions of the amino acid set are possible (for example eight  
 263 amino acids encoded by NRT), but at the cost of a reduced probability of finding highly active mutants.

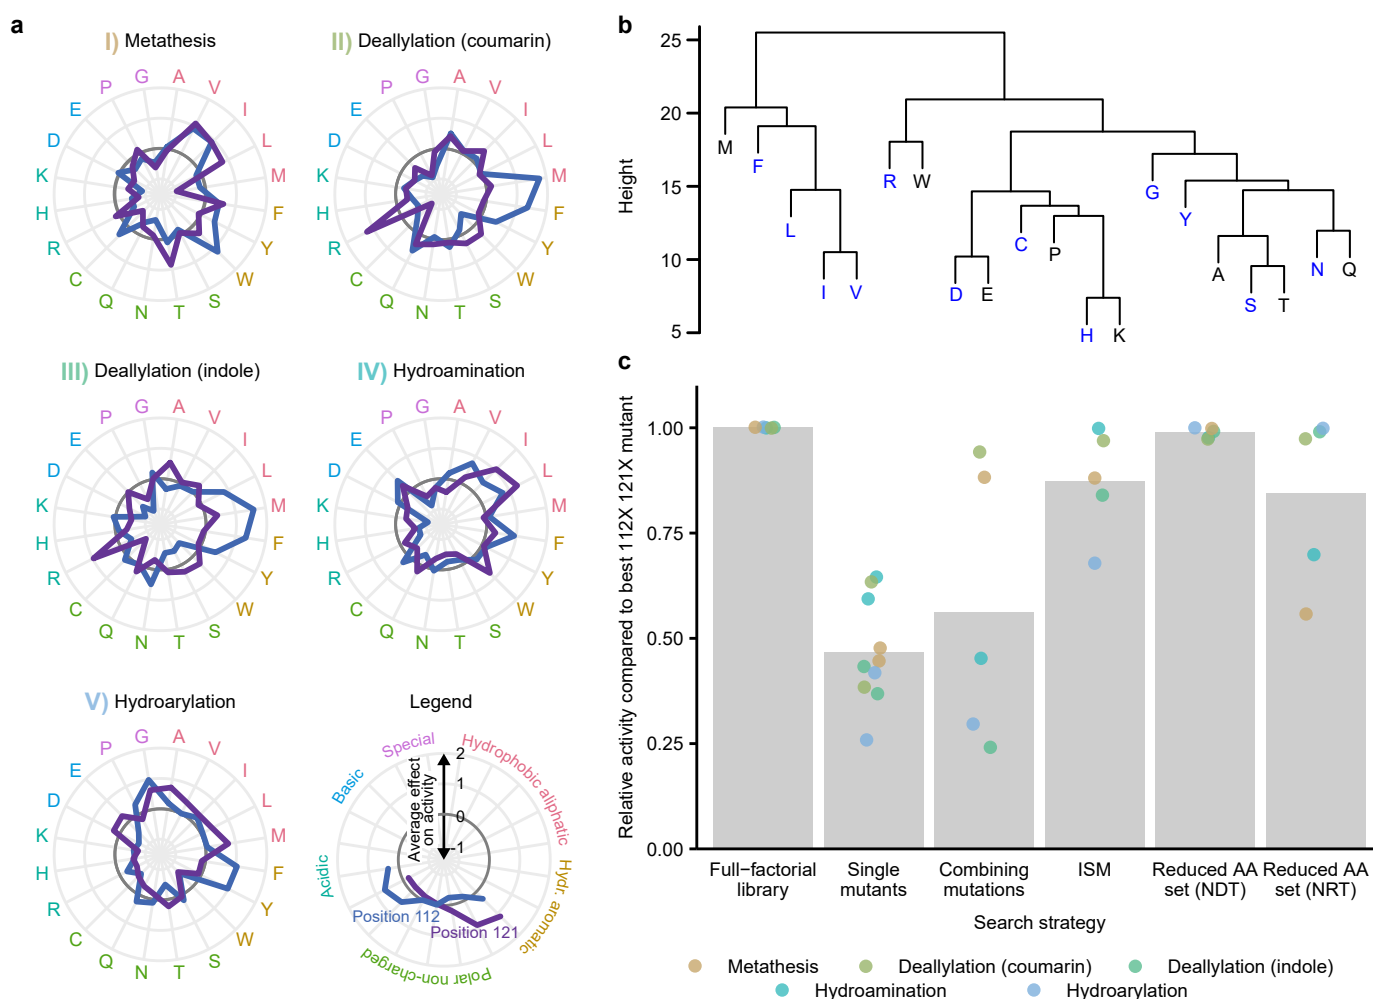

264

265 **Figure 4 | Analysis of amino acid effects and implications for directed evolution.** **a**, Average effect of amino acids on ArM  
 266 activity grouped by reaction and position. Data points outside the dark grey circle indicate a positive mean effect on activity, whereas  
 267 data points inside denote a negative effect. Values were standardized by subtracting the mean relative activity of all 400 mutants  
 268 for the respective reaction and dividing by the corresponding standard deviation. The mean across all 20 variants harboring the  
 269 respective amino acid at the indicated position is shown. **b**, Hierarchical clustering of amino acids based on the activity of variants  
 270 containing these residues at position 112 or 121 across all reactions (Methods). Amino acids that are encoded by the degenerate codon NDT are highlighted  
 271 in blue. **c**, Comparison of enzyme engineering strategies based on the results presented in this study. The success of various  
 272 strategies was compared to the full-factorial approach applied herein (from left to right): Screening single mutants for both positions  
 273 individually, combining the best mutations at the two individual positions, iterative saturation mutagenesis (ISM), as well as  
 274 screening combinatorial libraries based on reduced amino acid sets encoded by NDT (C, D, F, G, H, I, L, N, R, S, V, Y) and NRT  
 275 (C, D, G, H, N, R, S, Y) codons. The activity of the best mutant identified using the respective strategy is displayed relative to the  
 276 best double mutant among all 400 tested for each ArM reaction. Grey bars represent the mean across all “hits” for the five reactions  
 277 as identified by the different strategies.

278

## 279 Discussion

280 The results presented in this study highlight that Sav-based ArMs can be tailored to catalyze various new-  
281 to-nature reactions. The activity landscapes of ArMs are distinct for each reaction, underscoring the need  
282 for flexible enzyme engineering strategies that can be easily adapted to new transformations. The Sav 112X  
283 121X library along with the automation-compatible, periplasmic screening workflow represent the first  
284 platform for systematic ArM engineering to this end. Using this approach, we readily identified improved  
285 ArMs for five biorthogonal reactions. Importantly, the activity enhancements compare favorably to previous  
286 efforts of optimizing Sav-based ArMs<sup>34,35</sup>. Similarly, the “hits” appear to be more active than variants we  
287 identified previously for the same reactions. For instance, several studies had previously described allylic  
288 deallylases that uncage allylcarbamate-protected substrates. The most extensive engineering study of  
289 these was a screening of 80 surface-displayed variants with mutations at positions 112 and 121, yielding  
290 the double mutants 112M 121A and 112Y 121S as the most active variants for the uncaging of  
291 allylcarbamate-protected amino coumarin **3 (II)**<sup>35</sup>. While both of these mutants proofed to be highly active  
292 also in our periplasmic screen, several others displayed even higher activities, reaching an improvement  
293 over wild type of up to fifteen-fold, compared to nine- and ten-fold for the previously identified variants.

294 The recorded data on ArM activity and cellular Sav levels indicate that differences in the expression level  
295 of Sav mutants do not affect the screening performance of our platform, as an excess of biotin-binding sites  
296 is consistently ensured. This notion is corroborated by the observation that the best ArM mutants displayed  
297 an increased specific activity *in vitro*. At the same time, the large excess of binding sites points to a  
298 substantial potential to increase the cell-specific ArM activity for applications in biocatalysis, which could be  
299 achieved by increasing the concentration of cofactor and/or improving its uptake.

300 All reactions tested in the context of this study were found to be compatible with whole-cell  
301 biotransformations under mild reaction conditions, which is an important prerequisite for advanced  
302 applications in the context of synthetic biology<sup>5</sup>. In this regard, the indole-producing ArMs (reactions **III** and  
303 **IV**) are of particular interest, as a variety of applications can be imagined based on this metabolic  
304 intermediate and signaling molecule.

305 The combinatorial library focused on two crucial residues proofed to be a powerful tool for the engineering  
306 of ArMs, particularly when pursuing multiple catalytic activities in parallel from a common starting point. The  
307 combination of such libraries with the screening workflow presented herein enables the rapid discovery of  
308 active ArMs for any new reaction, potentially as a universal initial step followed by more extensive  
309 engineering campaigns. For the latter, the results from this study provide valuable implications such as the  
310 indicated high potential of reduced amino acid sets in the context of ArMs. Combined with lab automation,  
311 such amino acid sets render larger screening campaigns involving more amino acid positions feasible. For  
312 much larger numbers of targeted positions in Sav, ISM, potentially in combination with reduced amino acid  
313 alphabets, appears to be a promising strategy as it offers a good trade-off between experimental effort and  
314 the probability of finding highly active mutants. Lastly, as an alternative to the exhaustive search pursued

315 here, the screening platform may be used to perform undersampling of libraries with a much larger  
316 theoretical diversity. In combination with powerful machine learning techniques, which have been ascribed  
317 a high potential for enzyme engineering in general<sup>49</sup>, this would enable smartly guided and efficient directed  
318 evolution approaches for ArMs.

## 319 **Acknowledgments**

320 This work was kindly supported by the NCCR “Molecular Systems Engineering” and the European  
321 Commission (project: Madonna; grant no. 766975). TRW thanks the SNF (grant no. 200020\_182046) for  
322 generous support. SP and TV acknowledge support by the SNF (grant no. 31003A\_179521). The authors  
323 kindly thank Valerio Sabatino, Fabian Schwizer, Yoann Cotellet and Jaicy Vallapurackal for their help with  
324 substrate and cofactor synthesis, and Gregor Schmidt for technical support regarding lab automation.

## 325 **Author Contributions**

326 MJ and TRW conceived and supervised the study. SP advised the project. TV carried out biological and  
327 screening experiments and analyzed the data. FC and MP developed the gold-catalyzed reactions *in vitro*  
328 and synthesized the corresponding substrates and cofactors. TV, MJ, SP and TRW discussed the data. TV  
329 and MJ wrote the manuscript with input from all authors.

## 330 **Methods**

331 **Chemicals and reagents.** Unless stated otherwise, chemicals were obtained from Sigma-Aldrich, Acros or  
332 Fluorochem. Primers were synthesized by Sigma-Aldrich and enzymes for molecular cloning were obtained  
333 from New England Biolabs.

334 **Cloning of Sav library.** The Sav library was created based on a previously described expression plasmid  
335 that contains a T7-tagged Sav gene with an N-terminal *ompA* signal peptide for export to the periplasm  
336 under control of the T7 promoter in a pET30b vector (Addgene #138589)<sup>34</sup>. Positions 112 and 121 were  
337 randomized using the codon set described by Tang *et al.*<sup>50</sup> The plasmid was amplified in two fragments  
338 using either primer 1 and a mix of primers 2-5 (molar ratio of 12:6:1:1) or primer 10 and a mix of primers 6-  
339 9 (molar ratio of 12:6:1:1, see Supplementary Tab. 2 for primer sequences). PCRs were carried out using  
340 Q5 polymerase. Template plasmid was digested using DpnI and the PCR products were purified using a  
341 PCR purification kit (Sigma-Aldrich). Subsequently, the fragments were joined by Gibson assembly and  
342 used to transform chemically competent BL21-Gold(DE3) cells (Agilent Technologies). Individual clones  
343 were sequence-verified by Sanger sequencing (Microsynth AG). Having identified 250 out of 400 possible  
344 distinct double mutants this way, a second pool containing only the 150 missing variants was cloned. To  
345 this end, sequence-verified plasmids from the first library generation step were used as PCR templates and  
346 40 fragments, each containing a single amino acid exchange at position 112 or 121, were obtained by  
347 amplification with primers 1 and 12 or 10 and 11 for positions 112 and 121, respectively. Following DpnI  
348 digest and purification, these fragments were added to Gibson assembly reactions in combinations suitable  
349 for obtaining pools of missing variants. More specifically, this was achieved by adding one fragment with a  
350 desired mutation at position 112 per reaction, along with multiple fragments for position 121. Again,  
351 individual clones were sequenced after transformation. Eventually, 36 remaining variants were cloned  
352 individually by assembling the corresponding fragments. Refer to Supplementary Figure 1 for an overview  
353 of the library generation.

354 **Sav expression in 96-well plates.** 96 deep-well plates were filled with 500  $\mu$ L LB (+ 50 mg L<sup>-1</sup> kanamycin)  
355 per well. Cultures were inoculated from glycerol stocks and grown overnight at 37 °C and 300 rpm in a  
356 Kuhner LT-X shaker (50 mm shaking diameter). 20  $\mu$ L per culture were used to inoculate expression  
357 cultures in 1 mL LB with kanamycin. These cultures were grown at 37 °C and 300 rpm for 1.5 h. At this  
358 point, the plates were placed at room temperature for 20 min and subsequently Sav expression was induced  
359 by addition of 50  $\mu$ M isopropyl  $\beta$ -D-1-thiogalactopyranoside (IPTG). Expression was carried out at 20 °C  
360 and 300 rpm for an additional 20 h.

361 **Quantification of biotin-binding sites.** For measurement of Sav expression levels, the OD<sub>600</sub> of the  
362 cultures was determined in a plate reader (Infinite M1000 PRO, Tecan Group AG) using 50  $\mu$ L samples  
363 diluted with an equal volume of phosphate-buffered saline (PBS). The remaining cultures were then  
364 centrifuged (3,220 rcf, 20 °C, 10 min) and the pellets were resuspended in 250  $\mu$ L lysis buffer (50 mM Tris,  
365 150 mM NaCl, 5 mM EDTA, 1 g L<sup>-1</sup> lysozyme, pH 7.4). After 30 min incubation at room temperature, the

366 cell suspensions were subjected to three freeze-thaw cycles. Afterwards, 150  $\mu\text{L}$  of DNaseI buffer (50 mM  
367 Tris, 150 mM NaCl, 2 units  $\text{mL}^{-1}$  DNaseI, pH 7.4) were added and plates were incubated at 37  $^{\circ}\text{C}$  for 45 min  
368 before centrifugation (4800 rcf, 20  $^{\circ}\text{C}$ , 20 min). Subsequently, the concentration of biotin-binding sites in  
369 the supernatant was determined using a modified version of the assay described by Kada *et al.*<sup>40</sup>, which  
370 relies on the quenching of the fluorescence of a biotinylated fluorophore upon binding to Sav. Specifically,  
371 190  $\mu\text{L}$  binding site buffer (1  $\mu\text{M}$  biotin-4-fluorescein, 0.1  $\text{g L}^{-1}$  bovine serum albumin in PBS) were mixed  
372 with 10  $\mu\text{L}$  supernatant or purified Sav standard. After incubation at room temperature for 90 min, the  
373 fluorescence intensity was measured (excitation at 485 nm, emission at 525 nm) and a calibration curve  
374 produced with purified Sav was used to calculate the concentration of biotin-binding sites in each sample.

375 **Synthesis of cofactors and substrates.** Substrates **1**<sup>34</sup>, **3**<sup>35</sup>, **5**<sup>51</sup> and cofactors **(Biot-NHC)Ru**<sup>52</sup> and **(Biot-**  
376 **HQ)CpRu**<sup>35</sup> were prepared according to reported procedures. Substrate **7** was obtained from Sigma-  
377 Aldrich. A detailed description of the synthesis of **(Biot-NHC)Au1**, **(Biot-NHC')Au2**, substrate **8** and product  
378 **9** is available in the Supplementary Notes.

379 **Whole-cell screening.** Following the expression of Sav mutants in deep-well plates, the  $\text{OD}_{600}$  of the  
380 cultures was determined in a plate reader using 50  $\mu\text{L}$  samples diluted with an equal volume of PBS.  
381 Afterwards, the plates were centrifuged (3,220 rcf, 15  $^{\circ}\text{C}$ , 10 min), the supernatant was discarded and the  
382 pellets were resuspended in 400  $\mu\text{L}$  incubation buffer containing the respective reaction-specific cofactor.  
383 The composition of the incubation buffer varied for metathesis (2  $\mu\text{M}$  **(Biot-NHC)Ru** in 50 mM Tris, 0.9 %  
384 (w/v) NaCl, pH 7.4), deallylation (5  $\mu\text{M}$  **(Biot-HQ)CpRu** in 50 mM MES, 0.9 % NaCl, pH 6.1),  
385 hydroamination (10  $\mu\text{M}$  **(Biot-NHC)Au1** in 50 mM MES, 0.9 % NaCl, 5 mM diamide, pH 6.1) and  
386 hydroarylation (10  $\mu\text{M}$  **(Biot-NHC')Au2** in 50 mM MES, 0.9 % NaCl, 5 mM diamide, pH 5) reactions. The  
387 compositions of different buffers are summarized in Supplementary Table 3. Cells were incubated with the  
388 cofactor for 1 h at 15  $^{\circ}\text{C}$  and 300 rpm. Afterwards, plates were centrifuged (2,000 rcf, 15  $^{\circ}\text{C}$ , 10 min), the  
389 supernatant was discarded and the pellets were resuspended in 500  $\mu\text{L}$  of the respective incubation buffer  
390 lacking cofactor to remove unbound cofactor. Following another centrifugation step, cell pellets were  
391 resuspended in 200  $\mu\text{L}$  reaction buffer containing the respective substrate. The composition of this reaction  
392 buffer varied for metathesis (5 mM **1** in 100 mM sodium acetate, 0.5 M  $\text{MgCl}_2$ , pH 4), deallylation (500  $\mu\text{M}$   
393 **3** or **5** in 50 mM MES, 0.9 % NaCl, pH 6.1), hydroamination (5 mM **7** in 50 mM MES, 0.9 % NaCl, 5 mM  
394 diamide, pH 6.1) and hydroarylation (5 mM **9** in 50 mM MES, 0.9 % NaCl, 5 mM diamide, pH 5) reactions  
395 (Supplementary Tab. 3). Reactions were performed at 37  $^{\circ}\text{C}$  and 300 rpm for 20 h before determining the  
396 product concentration. Each 96-well plate contained 80 mutants to be tested along with four replicates of  
397 cells expressing wild-type Sav, Sav SL, Sav MA and cells lacking Sav as controls. To account for differences  
398 in cell density and plate-to-plate variations, the product concentrations were divided by the  $\text{OD}_{600}$  of the  
399 culture and normalized to the mean of the cell-specific product concentrations measured for the Sav SL  
400 (metathesis, hydroamination and hydroarylation) or Sav MA (deallylation) controls on the respective plate.  
401 These mutants had been identified as active in preliminary experiments. All variants were tested at least in  
402 biological duplicates.

403 **Lab automation.** The steps required for incubation of cells with cofactor, washing, substrate addition and  
404 OD<sub>600</sub> measurement were implemented on two connected Tecan Freedom EVO 200 Robots, equipped with  
405 a Kuhner deep-well plate shaker for incubations, a Rotanta 46 RSC centrifuge and a Tecan Infinite M200  
406 PRO plate reader for OD<sub>600</sub> measurement. The automated protocol was used for the deallylation with allyl  
407 carbamate coumarin (**II**) and the gold-catalyzed hydroarylation (**V**), while the screenings for the other  
408 reactions were performed manually.

409 **Product quantification by UPLC-MS.** To quantify the metathesis product **2**, an extraction was performed  
410 by adding 775  $\mu\text{L}$  methanol and 25  $\mu\text{L}$  internal standard (100  $\mu\text{M}$  in methanol) to each 200  $\mu\text{L}$  sample. The  
411 samples were incubated for one hour at 20 °C and 300 rpm, followed by centrifugation at 3,220 rcf and  
412 20 °C for 10 min. Subsequently, 50  $\mu\text{L}$  of the supernatant were mixed with 200  $\mu\text{L}$  water and analyzed by  
413 UPLC-MS. UPLC analysis was performed using a Waters H-Class Bio using a BEH C18 1.7  $\mu\text{M}$  column  
414 and a flow rate of 0.6 ml min<sup>-1</sup> (eluent A, 0.1 % formic acid in water; eluent B, 0.1% formic acid in acetonitrile;  
415 gradient at 0 min: 90 % A, 10 % B; at 0.5 min: 90 % A, 10 % B; at 2.5 min: 10 % A, 90 % B; at 3.5 min: 90 %  
416 A, 10 % B; at 4.5 min: 90 % A, 10 % B). Peak integration for SIR (single ion recording) were used for  
417 quantification, and concentrations of the metathesis product (retention time of 1.0 min  $\pm$  0.25 min) were  
418 determined on the basis of a standard curve with the ring-closed product in the presence of a fixed  
419 concentration of the nonadeuterated product (retention time of 1.0 min  $\pm$  0.25 min).

420 **Fluorescence measurements.** The fluorescent product **4** was quantified by measuring the fluorescence  
421 intensity at an excitation of 394 nm and emission of 460 nm. Product **9** was excited at 390 nm and measured  
422 at 488 nm. Measurements were carried out in black 96-well plates in an Infinite M1000 PRO plate reader.

423 **Kovac's assay.** Indole was quantified using the photometric Kovac's assay (adapted from Piñero-  
424 Fernandez *et al.*<sup>53</sup>). For measurements in culture supernatant, plates were centrifuged (3,220 rcf, 20 °C,  
425 10 min) and 110  $\mu\text{L}$  supernatant was mixed with 165  $\mu\text{L}$  Kovac's reagent (50 g L<sup>-1</sup> 4-  
426 (dimethylamino)benzaldehyde, 710 g L<sup>-1</sup> isoamylic alcohol, 240 g L<sup>-1</sup> hydrochloric acid) in a separate plate.  
427 After 5 min incubation, these plates were centrifuged (3,220 rcf, 20 °C, 10 min). Subsequently, 75  $\mu\text{L}$  of the  
428 upper phase were transferred to a new transparent plate and the absorbance at 540 nm was measured in  
429 a plate reader (Infinite M1000 PRO). The same procedure (omitting the first centrifugation step) was applied  
430 to measure indole after *in vitro* experiments. A standard curve was then used to determine indole  
431 concentrations.

432 **Sav expression for purification.** A single colony of BL21-Gold(DE3) harboring a plasmid from the  
433 previously described library for periplasmic expression of the desired Sav variant was used to inoculate a  
434 starter culture (4 mL LB with 50 mg L<sup>-1</sup> kanamycin), which was grown overnight at 37 °C and 200 rpm. On  
435 the following day, 100 mL LB with kanamycin in a 500 mL flask were inoculated to an OD<sub>600</sub> of 0.01. The  
436 culture was grown at 37 °C and 200 rpm until it reached an OD<sub>600</sub> of 0.5. At this point, the flask was placed  
437 at room temperature for 20 min and 50  $\mu\text{M}$  IPTG were added to induce Sav expression. Expression was

438 performed at 20 °C and 200 rpm overnight, and cells were harvested by centrifugation (3,220 rcf, 4 °C,  
439 15 min). Pellets were stored at -20 °C until purification.

440 **Sav purification.** Cell pellets were resuspended in lysis buffer (50 mM Tris, 150 mM NaCl, 1 g L<sup>-1</sup>  
441 lysozyme, pH 7.4) so as to reach a final OD<sub>600</sub> of 10. After 30 min incubation at room temperature, cell  
442 suspensions were subjected to three freeze-thaw cycles. Subsequently, nucleic acids were digested by  
443 addition of 1 µL benzonase (Merck KGaA) and 10 µL 1 M MgSO<sub>4</sub> followed by incubation at room  
444 temperature for 10 min. After centrifugation, the supernatant was transferred to a new tube and mixed with  
445 carbonate buffer (50 mM ammonium bicarbonate, 500 mM NaCl, pH 11) in a ratio of 2:3. 500 µL iminobiotin  
446 beads were added and the tubes were incubated at room temperature with shaking (120 rpm) for 1 h.  
447 Afterwards, the beads were washed twice with 15 mL carbonate buffer and resuspended in 2 mL acetate  
448 buffer (50 mM ammonium acetate, 500 mM NaCl, pH 4). After 20 min of incubation at room temperature  
449 with shaking, the tubes were centrifuged and the supernatant was dialyzed (SnakeSkin dialysis tubing with  
450 3.5 kDa molecular weight cut-off, Thermo Fisher Scientific) against 1 L of the desired buffer (Supplementary  
451 Table 4) for 24 h at room temperature with one buffer exchange.

452 ***In vitro* catalysis.** *In vitro* reactions were performed with 2.5 µM purified Sav (tetrameric; corresponding to  
453 10 µM biotin-binding sites) in a volume of 200 µL in glass vials. Cofactor and substrate concentrations as  
454 well as buffer conditions varied between reactions and are listed in Supplementary Table 2. Reactions were  
455 carried out at 37 °C and 200 rpm for 20 h.

456 **Data analysis.** Data were analyzed using R 4.0.2<sup>54</sup>. For clustering and calculating amino acid effects,  
457 activity values were standardized by subtracting the mean and dividing by the standard deviation of all  
458 activity values for the respective reaction. Hierarchical clustering was done by calculating the Euclidian  
459 distances between all standardized activity values of variants harboring the respective amino acid at  
460 position 112 or 121 (20 values per position and reaction, amounting to 200 values in total) and clustering  
461 these using the hclust function<sup>54</sup> with complete linkage. The activity of all 400 mutants was further analyzed  
462 by two-way analysis of variance (ANOVA). To this end, position 112 and 121 were treated as explanatory  
463 variables (with 20 levels corresponding to the canonical amino acids). For analyzing the variance explained  
464 by individual factors, an interaction term was included, whereas it was omitted in order to generate a purely  
465 additive model.

466 **Data and code availability.** All data and code required to reproduce the figures and analyses presented  
467 in the main text will be made publicly accessible upon publication.

468



469

## References

- 470 1. Lewis, J. C. Artificial metalloenzymes and metallopeptide catalysts for organic synthesis. *ACS Catal.* **3**, 2954–  
471 2975 (2013).
- 472 2. Rosati, F. & Roelfes, G. Artificial metalloenzymes. *ChemCatChem* **2**, 916–927 (2010).
- 473 3. Bornscheuer, U. T. The fourth wave of biocatalysis is approaching. *Philos. Trans. R. Soc. A Math. Phys. Eng.*  
474 *Sci.* **376**, 20170063 (2018).
- 475 4. Hammer, S. C., Knight, A. M. & Arnold, F. H. Design and evolution of enzymes for non-natural chemistry. *Curr.*  
476 *Opin. Green Sustain. Chem.* **7**, 23–30 (2017).
- 477 5. Vornholt, T. & Jeschek, M. The quest for xenobiotic enzymes - from new enzymes for chemistry to a novel  
478 chemistry of life. *ChemBioChem* (2020). doi:10.1002/cbic.202000121
- 479 6. Kan, S. B. J., Lewis, R. D., Chen, K. & Arnold, F. H. Directed evolution of cytochrome c for carbon–silicon bond  
480 formation: Bringing silicon to life. *Science* **354**, 1048–1051 (2016).
- 481 7. Tinoco, A., Steck, V., Tyagi, V. & Fasan, R. Highly diastereo- and enantioselective synthesis of trifluoromethyl-  
482 substituted cyclopropanes via myoglobin-catalyzed transfer of trifluoromethylcarbene. *J. Am. Chem. Soc.* **139**,  
483 5293–5296 (2017).
- 484 8. Song, W. J. & Tezcan, F. A. A designed supramolecular protein assembly with in vivo enzymatic activity.  
485 *Science* **346**, 1525–1528 (2014).
- 486 9. Studer, S. *et al.* Evolution of a highly active and enantiospecific metalloenzyme from short peptides. *Science*  
487 **362**, 1285–1288 (2018).
- 488 10. Drienovská, I. *et al.* Design of an enantioselective artificial metallo-hydratase enzyme containing an unnatural  
489 metal-binding amino acid. *Chem. Sci.* **8**, 7228–7235 (2017).
- 490 11. Cangelosi, V. M., Deb, A., Penner-Hahn, J. E. & Pecoraro, V. L. A de novo designed metalloenzyme for the  
491 hydration of CO<sub>2</sub>. *Angew. Chem. Int. Ed.* **53**, 7900–7903 (2014).
- 492 12. Key, H. M., Dydio, P., Clark, D. S. & Hartwig, J. F. Abiological catalysis by artificial haem proteins containing  
493 noble metals in place of iron. *Nature* **534**, 534–537 (2016).
- 494 13. Yang, H. *et al.* Evolving artificial metalloenzymes via random mutagenesis. *Nat. Chem.* **10**, 318–324 (2018).
- 495 14. Mirts, E. N., Petrik, I. D., Hosseinzadeh, P., Nilges, M. J. & Lu, Y. A designed heme-[4Fe-4S] metalloenzyme  
496 catalyzes sulfite reduction like the native enzyme. *Science* **361**, 1098–1101 (2018).
- 497 15. Raines, D. J. *et al.* Redox-switchable siderophore anchor enables reversible artificial metalloenzyme assembly.  
498 *Nat. Catal.* **1**, 680–688 (2018).
- 499 16. Eda, S. *et al.* Biocompatibility and therapeutic potential of glycosylated albumin artificial metalloenzymes. *Nat.*  
500 *Catal.* **2**, (2019).
- 501 17. Dydio, P. *et al.* An artificial metalloenzyme with the kinetics of native enzymes. *Science* **354**, 102–106 (2016).
- 502 18. Oohora, K., Kihira, Y., Mizohata, E., Inoue, T. & Hayashi, T. C(sp<sup>3</sup>)-H bond hydroxylation catalyzed by  
503 myoglobin reconstituted with manganese porphycene. *J. Am. Chem. Soc.* **135**, 17282–17285 (2013).
- 504 19. Chevalley, A., Cherrier, M. V., Fontecilla-Camps, J. C., Ghasemi, M. & Salmain, M. Artificial metalloenzymes  
505 derived from bovine β-lactoglobulin for the asymmetric transfer hydrogenation of an aryl ketone – synthesis,  
506 characterization and catalytic activity. *Dalt. Trans.* **43**, 5482–5489 (2014).
- 507 20. Lopez, S. *et al.* A mechanistic rationale approach revealed the unexpected chemoselectivity of an artificial Ru-  
508 dependent oxidase: A dual experimental/theoretical approach. *ACS Catal.* **10**, 5631–5645 (2020).
- 509 21. Burke, A. J. *et al.* Design and evolution of an enzyme with a non-canonical organocatalytic mechanism. *Nature*  
510 **570**, 219–223 (2019).
- 511 22. Emmanuel, M. A., Greenberg, N. R., Oblinsky, D. G. & Hyster, T. K. Accessing non-natural reactivity by  
512 irradiating nicotinamide-dependent enzymes with light. *Nature* **540**, 414–417 (2016).
- 513 23. Biegasiewicz, K. F. *et al.* Photoexcitation of flavoenzymes enables a stereoselective radical cyclization.  
514 *Science* **364**, 1166–1169 (2019).
- 515 24. Heinisch, T. & Ward, T. R. Artificial metalloenzymes based on the biotin-streptavidin technology: challenges  
516 and opportunities. *Acc. Chem. Res.* **49**, 1711–1721 (2016).
- 517 25. Nödling, A. R. *et al.* Reactivity and selectivity of iminium organocatalysis improved by a protein host. *Angew.*  
518 *Chem. Int. Ed.* **57**, 12478–12482 (2018).
- 519 26. Hassan, I. S. *et al.* Asymmetric δ-lactam synthesis with a monomeric streptavidin artificial metalloenzyme. *J.*  
520 *Am. Chem. Soc.* **141**, 4815–4819 (2019).
- 521 27. Zeymer, C. & Hilvert, D. Directed evolution of protein catalysts. *Annu. Rev. Biochem.* **87**, 131–157 (2018).

- 522 28. Zhang, R. K., Romney, D. K., Kan, S. B. J. & Arnold, F. H. Directed evolution of artificial metalloenzymes:  
523 bridging synthetic chemistry and biology. in *Artificial metalloenzymes and metalloDNAszymes in catalysis* 137–  
524 170 (Wiley-VCH Verlag GmbH & Co. KGaA, 2018). doi:10.1002/9783527804085.ch5
- 525 29. Reetz, M. T. Directed evolution of artificial metalloenzymes: a universal means to tune the selectivity of  
526 transition metal catalysts? *Acc. Chem. Res.* (2019). doi:10.1021/acs.accounts.8b00582
- 527 30. Markel, U., Sauer, D. F., Schiffels, J., Okuda, J. & Schwaneberg, U. Towards the evolution of artificial  
528 metalloenzymes—a protein engineer’s perspective. *Angew. Chem. Int. Ed.* **58**, 4454–4464 (2019).
- 529 31. Turner, N. J. Directed evolution of enzymes for applied biocatalysis. *Trends Biotechnol.* **21**, 474–478 (2003).
- 530 32. Creus, M. *et al.* X-ray structure and designed evolution of an artificial transfer hydrogenase. *Angew. Chem. Int.*  
531 *Ed.* **47**, 1400–1404 (2008).
- 532 33. Hyster, T. K., Knorr, L., Ward, T. R. & Rovis, T. Biotinylated Rh(III) complexes in engineered streptavidin for  
533 accelerated asymmetric C-H activation. *Science* **338**, 500–503 (2012).
- 534 34. Jeschek, M. *et al.* Directed evolution of artificial metalloenzymes for in vivo metathesis. *Nature* **537**, 661–665  
535 (2016).
- 536 35. Heinisch, T. *et al.* E. coli surface display of streptavidin for directed evolution of an allylic deallylase. *Chem.*  
537 *Sci.* **9**, 5383–5388 (2018).
- 538 36. Grimm, A. R. *et al.* A whole cell E. coli display platform for artificial metalloenzymes: poly(phenylacetylene)  
539 production with a rhodium-nitrobindin metalloprotein. *ACS Catal.* **8**, 2611–2614 (2018).
- 540 37. Donnelly, A. E., Murphy, G. S., Digianantonio, K. M. & Hecht, M. H. A de novo enzyme catalyzes a life-  
541 sustaining reaction in Escherichia coli. *Nat. Chem. Biol.* **14**, 253–255 (2018).
- 542 38. Wilson, Y. M., Dürrenberger, M., Nogueira, E. S. & Ward, T. R. Neutralizing the detrimental effect of glutathione  
543 on precious metal catalysts. *J. Am. Chem. Soc.* **136**, 8928–8932 (2014).
- 544 39. Jeschek, M., Panke, S. & Ward, T. R. Periplasmic screening for artificial metalloenzymes. in *Methods in*  
545 *Enzymology* **580**, 539–556 (Elsevier Inc., 2016).
- 546 40. Kada, G., Kaiser, K., Falk, H. & Gruber, H. J. Rapid estimation of avidin and streptavidin by fluorescence  
547 quenching or fluorescence polarization. *Biochim. Biophys. Acta* **1427**, 44–8 (1999).
- 548 41. Tokuriki, N. & Tawfik, D. S. Stability effects of mutations and protein evolvability. *Curr. Opin. Struct. Biol.* **19**,  
549 596–604 (2009).
- 550 42. Völker, T., Dempwolff, F., Graumann, P. L. & Meggers, E. Progress towards bioorthogonal catalysis with  
551 organometallic compounds. *Angew. Chem. Int. Ed.* **53**, 10536–10540 (2014).
- 552 43. Völker, T. & Meggers, E. Chemical activation in blood serum and human cell culture: improved ruthenium  
553 complex for catalytic uncaging of alloc-protected amines. *ChemBioChem* **18**, 1083–1086 (2017).
- 554 44. Do, J. H., Kim, H. N., Yoon, J., Kim, J. S. & Kim, H. J. A rationally designed fluorescence turn-on probe for the  
555 gold(III) ion. *Org. Lett.* **12**, 932–934 (2010).
- 556 45. Sasmal, P. K., Streu, C. N. & Meggers, E. Metal complex catalysis in living biological systems. *Chem. Commun.*  
557 **49**, 1581–1587 (2013).
- 558 46. Reetz, M. T. The importance of additive and non-additive mutational effects in protein engineering. *Angew.*  
559 *Chem. Int. Ed.* **52**, 2658–2666 (2013).
- 560 47. Reetz, M. T. & Carballeira, J. D. Iterative saturation mutagenesis (ISM) for rapid directed evolution of functional  
561 enzymes. *Nat. Protoc.* **2**, 891–903 (2007).
- 562 48. Reetz, M. T., Kahakeaw, D. & Lohmer, R. Addressing the numbers problem in directed evolution.  
563 *ChemBioChem* **9**, 1797–1804 (2008).
- 564 49. Yang, K. K., Wu, Z. & Arnold, F. H. Machine-learning-guided directed evolution for protein engineering. *Nat.*  
565 *Methods* **16**, 687–694 (2019).
- 566 50. Tang, L. *et al.* Construction of ‘small-intelligent’ focused mutagenesis libraries using well-designed  
567 combinatorial degenerate primers. *Biotechniques* **52**, 149–158 (2012).
- 568 51. Jacquemard, U. *et al.* Mild and selective deprotection of carbamates with Bu<sub>4</sub>NF. *Tetrahedron* **60**, 10039–  
569 10047 (2004).
- 570 52. Kajetanowicz, A., Chatterjee, A., Reuter, R. & Ward, T. R. Biotinylated metathesis catalysts: synthesis and  
571 performance in ring closing metathesis. *Catal. Letters* **144**, 373–379 (2014).
- 572 53. Piñero-Fernandez, S., Chimere, C., Keyser, U. F. & Summers, D. K. Indole transport across Escherichia coli  
573 membranes. *J. Bacteriol.* **193**, 1793–1798 (2011).
- 574 54. R Core Team. R: A language and environment for statistical computing. *R Foundation for Statistical Computing*  
575 (2019). Available at: <https://www.r-project.org/>.
